# Supplementary material
Source: PubMed Central journal article supplement (PMC4168298)
Supplement: supp_ssu072_Additional_Supplementary_files.pdf [file supp_ssu072_Additional_Supplementary_files.pdf]

## Supplemental Figure 1.

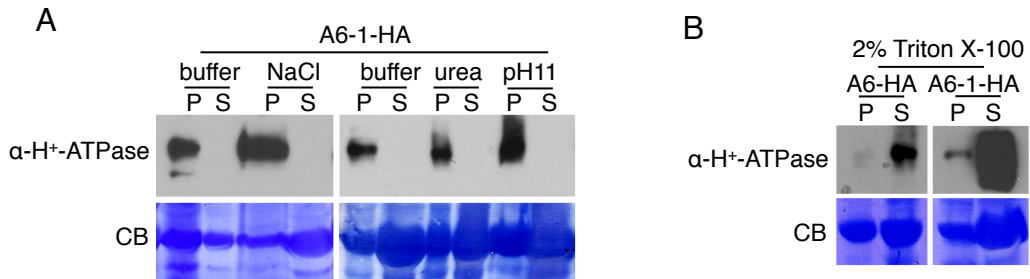

**Supplemental Figure 1.** Figure S1. ACD6-1 and ACD6 behave like the integral membrane protein H<sup>+</sup>-ATPase. Samples from Figure 1 (A) and (B) were separated by SDS-PAGE and analyzed by immunoblotting with ATPase antibody to show that ACD6 behaves like another integral membrane protein, which can only be solubilized by detergent.

## Supplemental Figure 2.

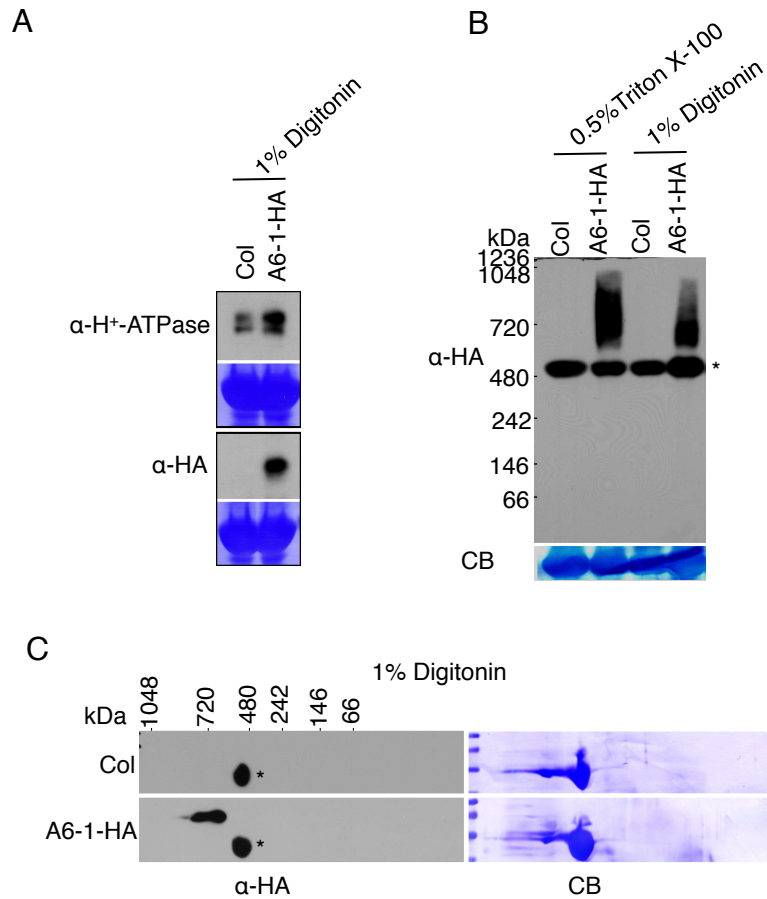

**Supplemental Figure 2.** Characterization of ACD6-1 Complex After Digitonin Solubilization. Microsomal proteins from leaves of ACD6-1-HA (A6-1-HA) plants were solubilized with 0.5% Triton X-100 or 1% digitonin. Solubilized protein were separated using SDS-PAGE (**A**), the first dimension of BN-PAGE (**B**), or SDS-PAGE following BN-PAGE (**C**), and analyzed by immunoblotting with ATPase- and HA-antibody, respectively. CB: coomassie-blue stained membrane. \* Non-specific band

### Supplemental Figure 3.

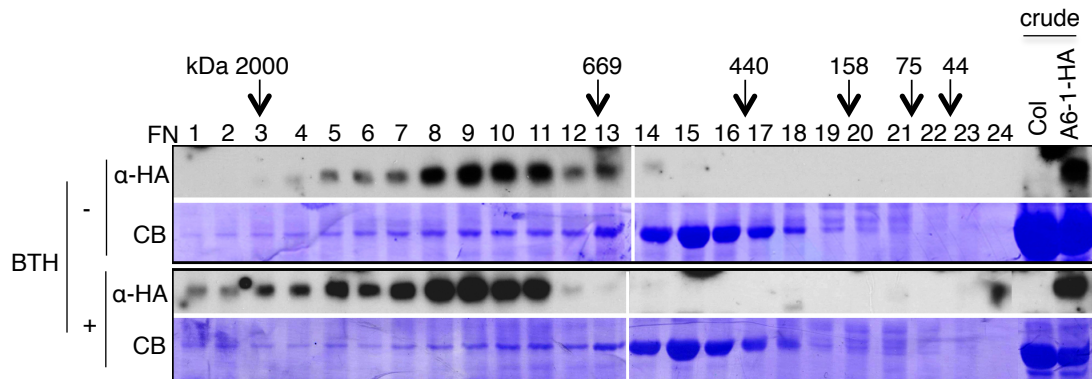

**Supplemental Figure 3.** Characterization of ACD6-1-HA Complexes by Fast Protein Liquid Chromatography Gel Filtration (FPLC). Microsomal proteins were isolated from untreated (top blot) and BTH-treated (bottom blot) plants that express ACD6-1-HA (A6-1-HA). Triton X-100-solubilized microsomal proteins were separated by FPLC and an equal volume of each fraction was subjected to SDS-PAGE, and immunoblotted with HA antibody. Numbers on the top show the size of markers. Note the increase in the molecular weight of complexes in the extract from BTH-treated plants. CB: coomassie blue stained membrane. White lines separate two membranes. All samples were processed, run on two gels blotted to two membranes, probed and developed at the same time.

#### Supplemental Figure 4.

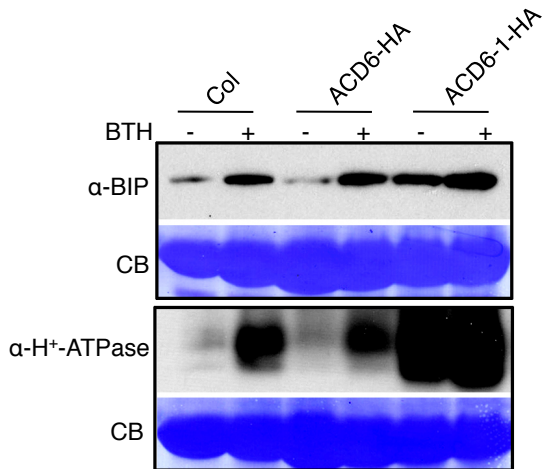

**Supplemental Figure 4.** Levels of Marker Proteins ATPase and BIP Increase in the Membrane After BTH Treatment. Microsomal membrane protein extracts from the indicated plants treated with BTH (+) or mock treated (-) as in Figure 3A were subjected to SDS-PAGE and immunoblotting with indicated antibodies. CB: coomassie-blue stained membrane. These experiments were repeated three times with similar results.

## Supplemental Figure 5.

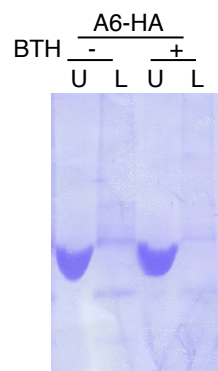

**Supplemental Figure 5.** Coomassie-blue stained membrane for Figure 3 (C) showing that BTH treatment does not cause changes in the overall protein levels in the respective fractions.

## Supplemental Figure 6.

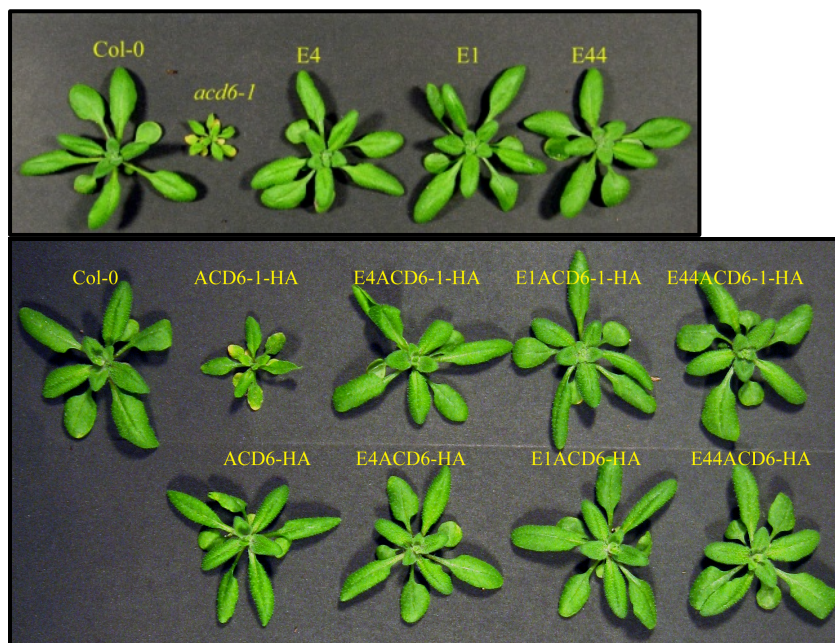

**Supplemental Figure 6.** Phenotypes of Transgenic Plants that Produce ACD6-1-HA or ACD6-HA Variants that Contain Ankyrin Domain Amino Acid Substitutions. All transgenic plants expressing ACD6-1-HA or ACD6-HA with one of the amino acid substitutions in the ankyrin domain (see legend to Figure 4) appeared morphologically similar to wild type (Col-0). Original intragenic ankyrin mutants, *acd6-1* (top panel) and transgenic plants that produce ACD6-1-HA or ACD6-HA are shown for comparison. Plants were 21 days old when photographed.

## Supplemental Figure 7.

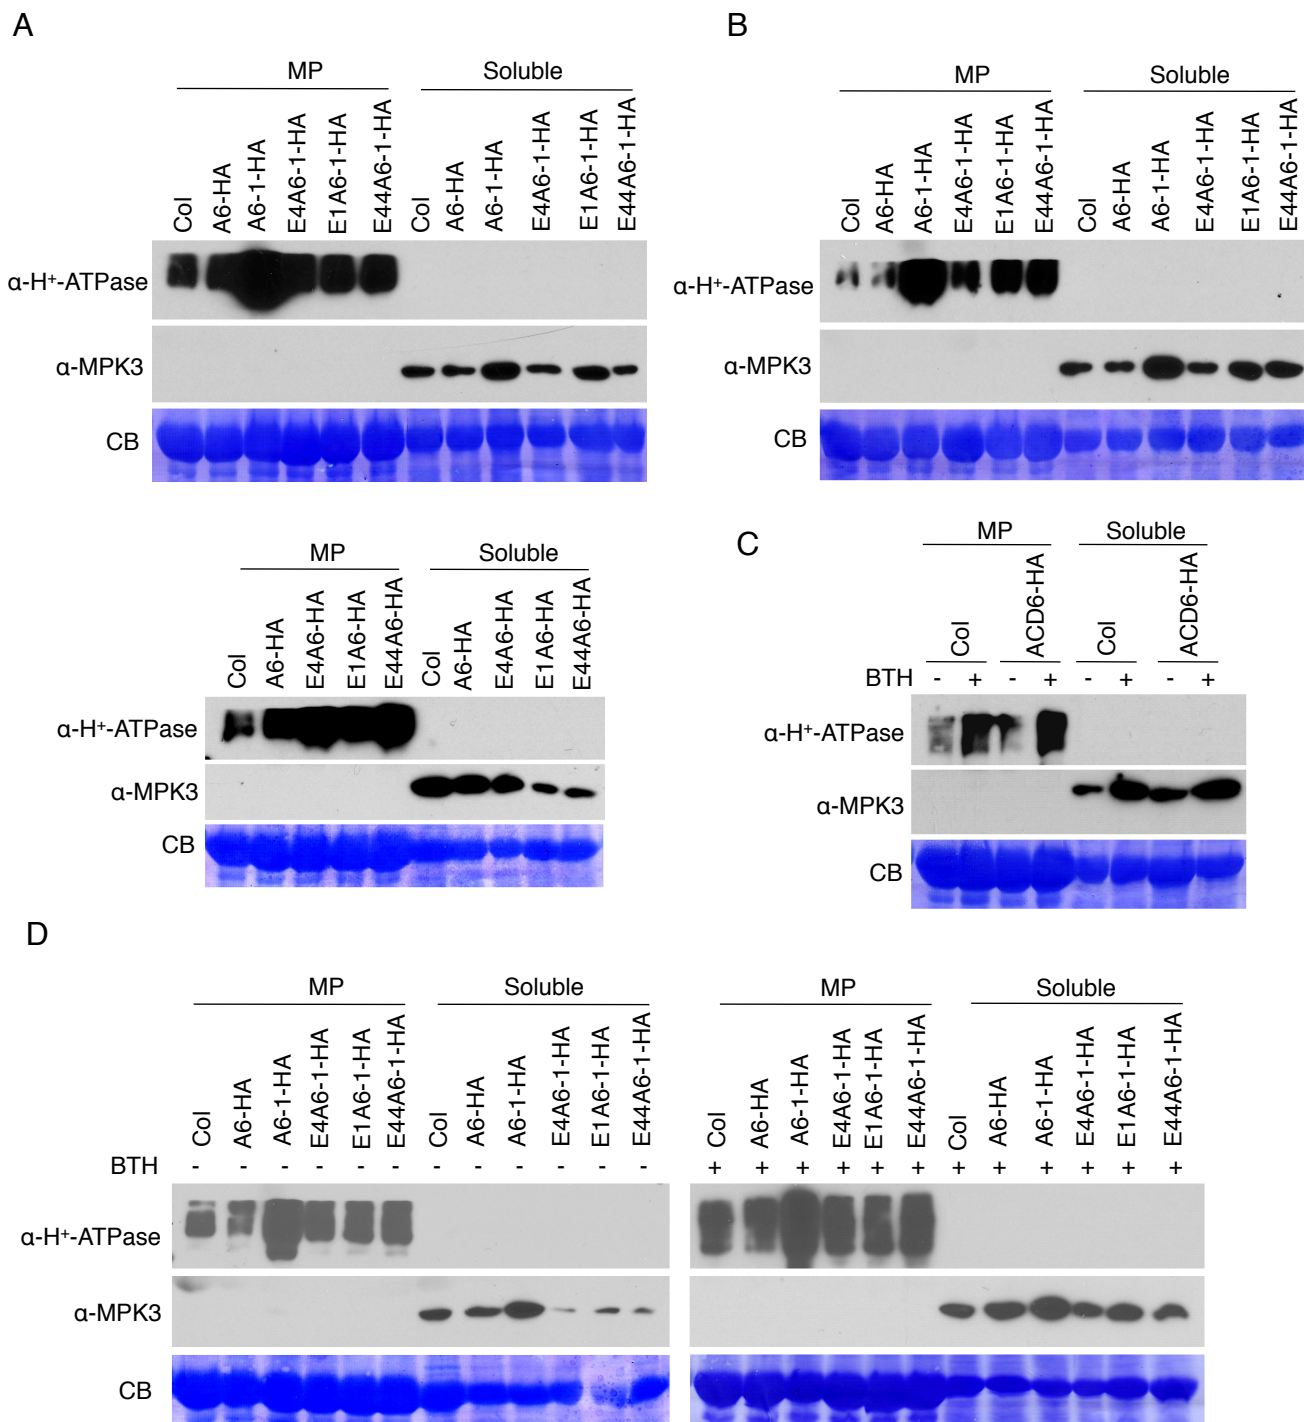

**Supplemental Figure 7.** Fractionation Controls for Samples from Figure 5 (A) to (D). Samples were separated by SDS-PAGE and analyzed by immunoblotting with ATPase and MPK3 antibodies, as membrane and cytosolic markers, respectively.

## Supplemental Figure 8.

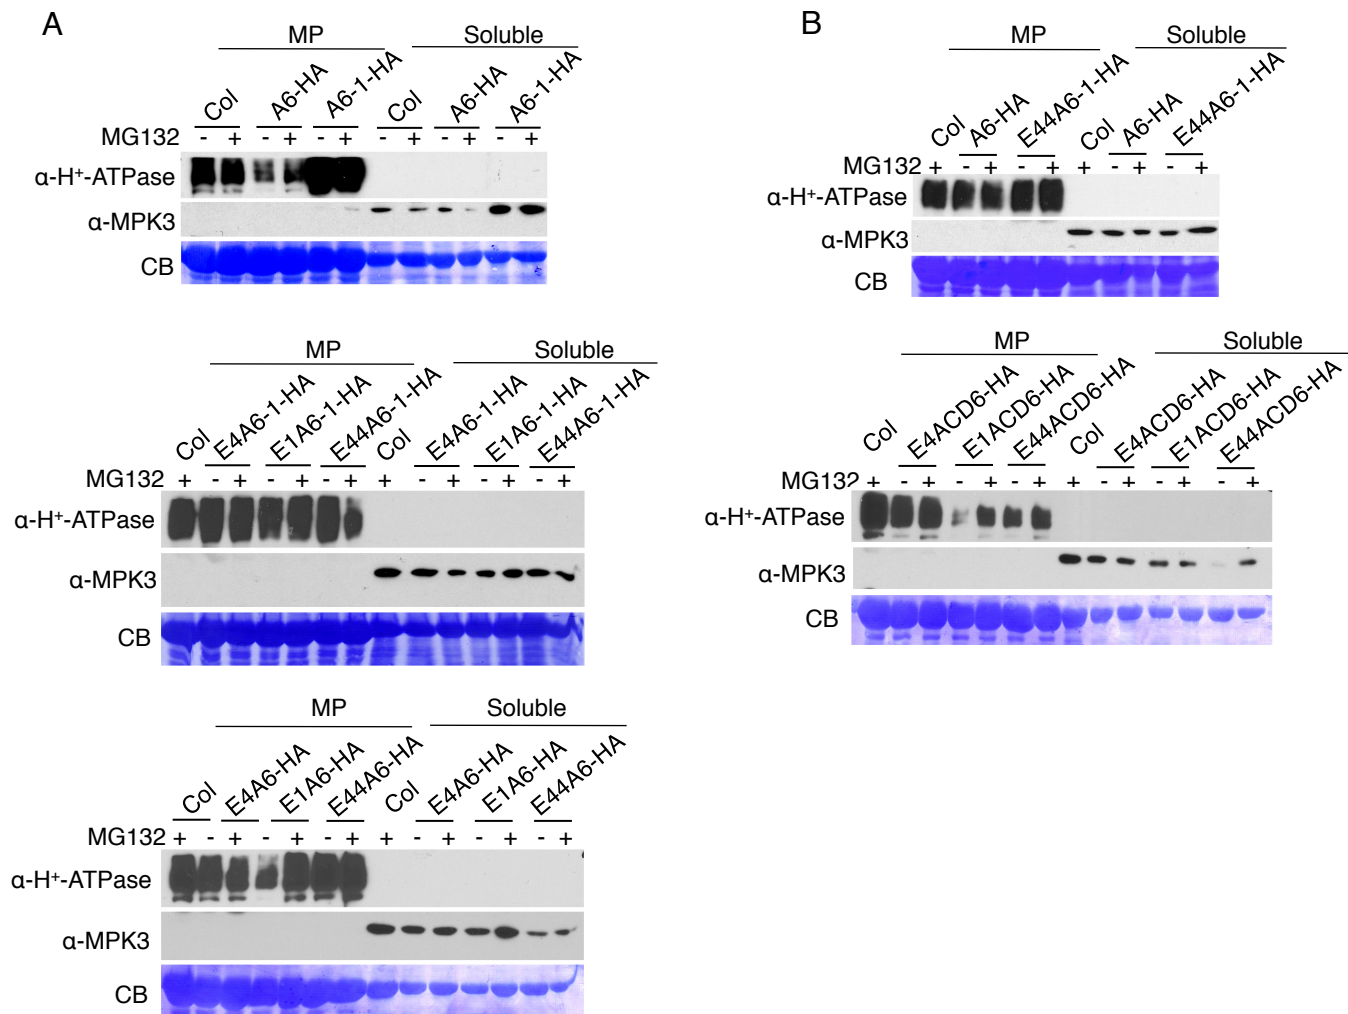

**Supplemental Figure 8.** Fractionation Controls for Samples from Figure 6 (A) and (B). Samples were separated by SDS-PAGE and analyzed by immunoblotting with ATPase and MPK3 antibodies, as membrane and cytosolic markers, respectively.



**Supplemental Figure 9.**

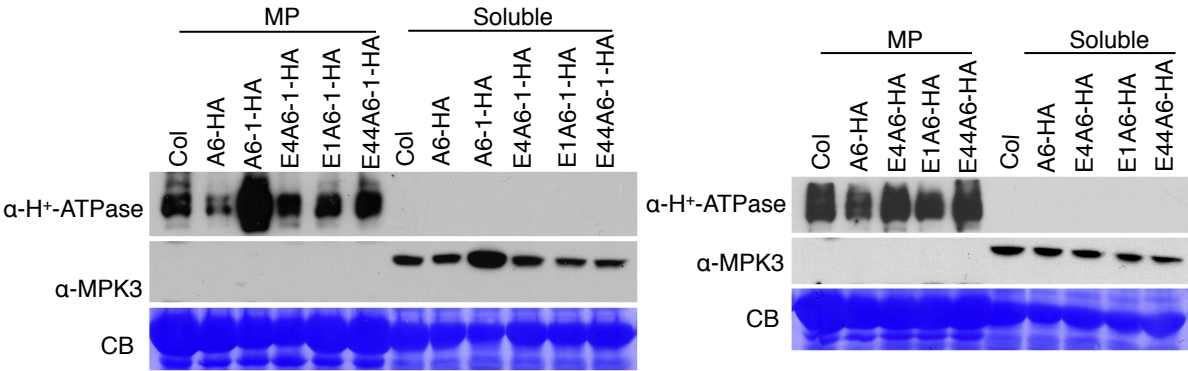

**Supplemental Figure 9.** Fractionation controls for samples from Figure 7 (D) Samples were separated by SDS-PAGE and analyzed by immunoblotting with ATPase- and MPK3- antibody, respectively.

### Supplemental Figure 10.

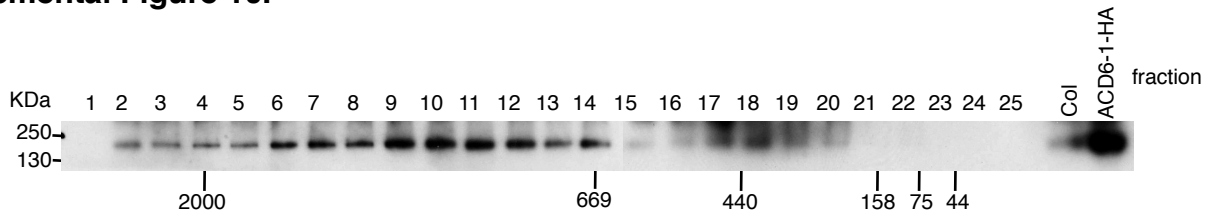

**Supplemental Figure 10.** FLS2 Complexes In Plants that Express ACD6-1-HA Characterized Using FPLC. Solubilized microsomal proteins were separated by FPLC. Fractions were loaded on SDS-PAGE, and analyzed by immunoblotting with FLS2 antibodies. Results are similar to those obtained using 2D BN-gels, see Figure 8B. Additionally, note the overlap in the size of complexes with ACD6-1-HA (Supplemental Figure 3 online).

## Supplemental Figure 11.

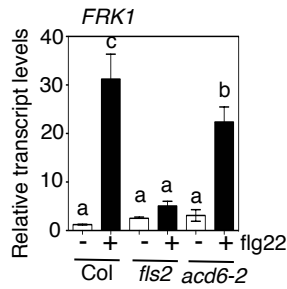

**Supplemental Figure 11.** Induction of the flg22-responsive gene *FRK1* is partially ACD6-dependent.

Transcript levels of the flg22-responsive gene *FRK1* 1h after water or 1 $\mu$ M flg22 infiltration of WT (Col), *fls2* and *acd6-2* leaves determined by qRT-PCR. Each experiment to determine transcript level used leaves from four different plants per genotype and treatment. The graph shows the combined data of two biological repeats performed at different times. – or + indicates water (-) or flg22 (+). Letters above bars represent significance groups as determined by the Newman-Keuls test,  $P < 0.05$  or better. Bars indicate standard error. The *acd6-2* mutant also showed reduced *FRK1* expression relative to wild type after flg22 treatment in two additional replicates using plants grown on sterile media.

## Supplemental Table 1. Peptides recovered by LC-MS/MS from ACD6-1-HA Immunoprecipitates

---

| Name | Peptide sequence                       | Sequest<br>$\Delta Cn$ score | # times peptide<br>was recovered | Coverage              |
|------|----------------------------------------|------------------------------|----------------------------------|-----------------------|
| FLS2 | Sample-1: RTRVILILGSAAALLLVLLLVLILTCK, | 1                            | 1                                | Sample-1: 31/1173, 3% |
|      | VILILGSAAALLLVLLLVLILTCKKK             | 0.711                        | 1                                |                       |
|      | Sample-2: TRVILILGSAAALLLVLLLVLILTCK   | 1                            | 1                                | Sample-2: 28/1173, 2% |
|      | Sample-3: VILILGSAAALLLVLLLVLILTCKKK   | 1                            | 1                                | Sample-3: 28/1173, 2% |

---
